# Supplementary material for: Present-day radiative effect from radiation-absorbing aerosols in snow
Source: Copernicus journal article supplement (doi:10.5194/acp-2020-585), 2020-08-13
Supplement: Supplementary file 1 [file acp-2020-585-supplement.pdf]

## Supporting information for

### Present-day radiative effect from radiation-absorbing aerosols in snow

Paolo Tuccella, Giovanni Pitari, Valentina Colaiuda, Gabriele Curci

**Table S1. Summary of the MACs in NIR band used in the experiments. The units are in  $\text{m}^2/\text{g}$ .**

| Experiment | MAC adopted for each radiation-absorbing aerosol species |              |                |               |
|------------|----------------------------------------------------------|--------------|----------------|---------------|
|            | Fresh FF BC                                              | Aged FF BC   | Fresh BF/BB BC | Aged BF/BB BC |
| CTRL       | 3.2                                                      | 4.8          | 3.5            | 5.3           |
| BC-H       | 3.2                                                      | 6.1          | 3.5            | 6.7           |
| BC-L       | 3.2                                                      | 3.5          | 3.5            | 3.9           |
|            | Fresh BF BrC                                             | Aged BF BrC  | Fresh BB BrC   | Aged BB BrC   |
|            |                                                          |              |                |               |
| CTRL       | 0.15                                                     | 0.15         | 0.15           | 0.15          |
| BrC-H      | 0.15                                                     | 0.15         | 0.15           | 0.15          |
| BrC-L      | 0.15                                                     | 0.15         | 0.15           | 0.15          |
|            | Dust 0.36–0.6                                            | Dust 2.6–3.6 | Dust 4.4–6.0   | Dust 7.0–12.0 |
|            |                                                          |              |                |               |
| CTRL       | 0.025                                                    | 0.034        | 0.029          | 0.025         |
| DUST-H     | 0.031                                                    | 0.040        | 0.034          | 0.029         |
| DUST-L     | 0.014                                                    | 0.020        | 0.018          | 0.016         |

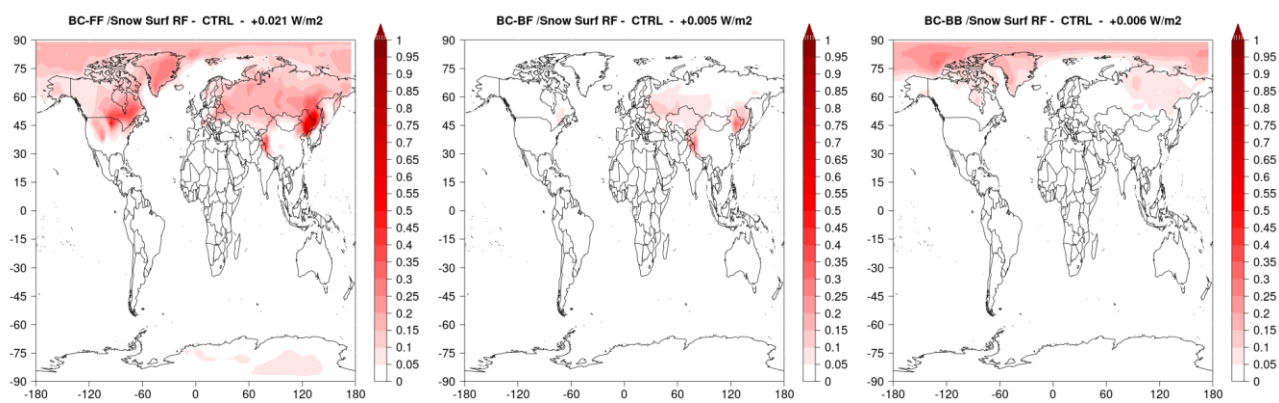

**Figure S1.** All-sky annual mean (2010–2014) black carbon snow RF divided by source (FF=fossil fuel, BF=biofuel, BB=biomass burning).

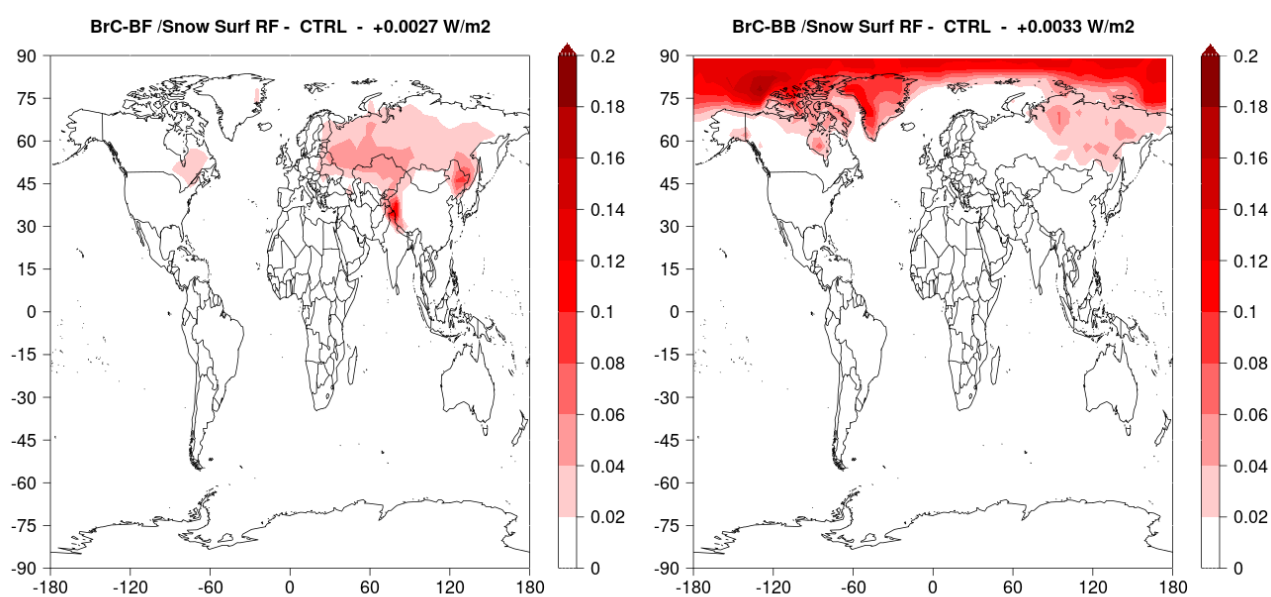

**Figure S2.** Same as Figure S1, but for brown carbon.

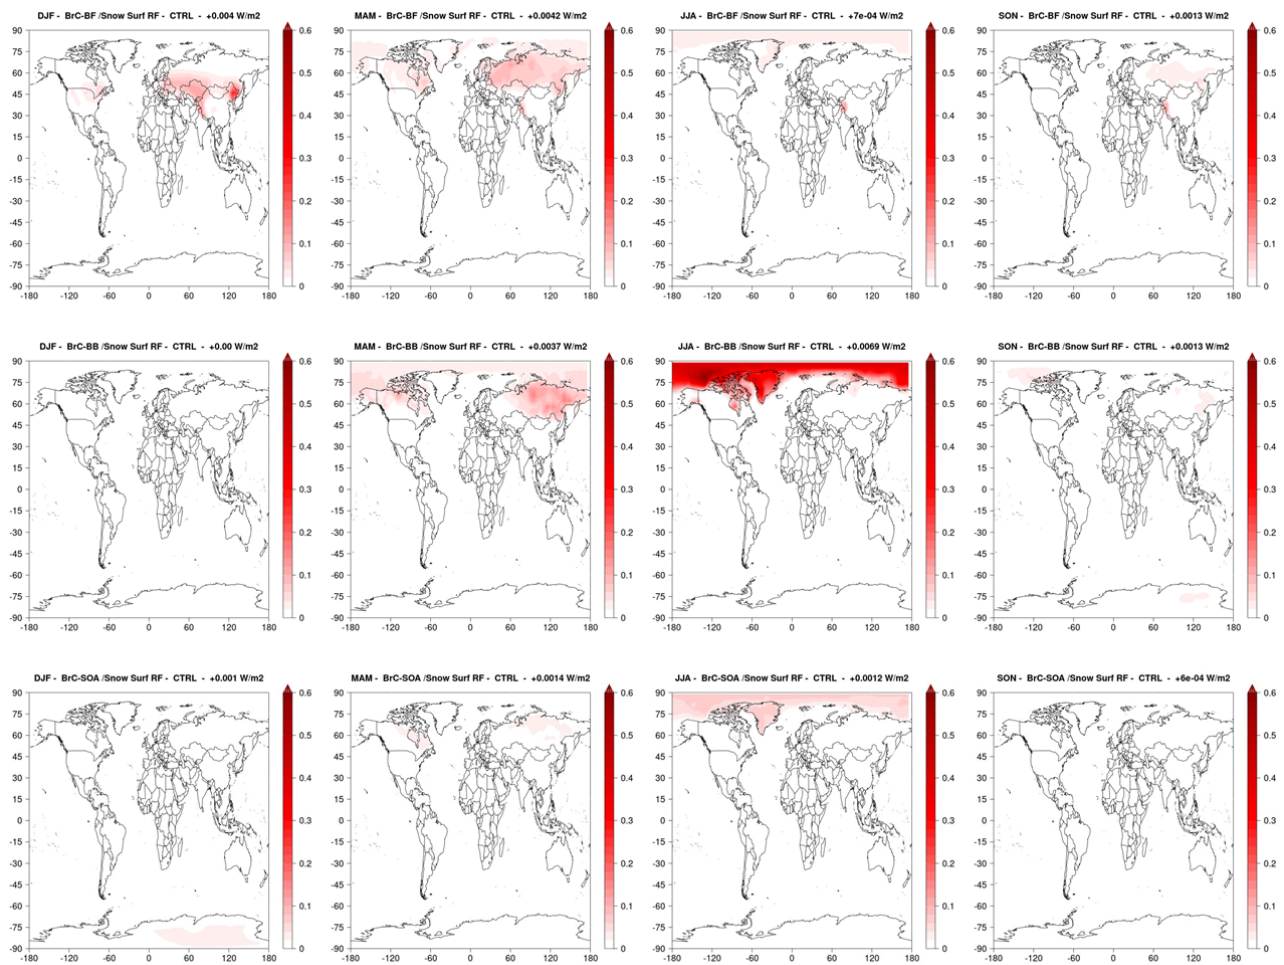

**Figure S3. All-sky annual mean (2010–2014) seasonal BrC snow RF divided by source.**

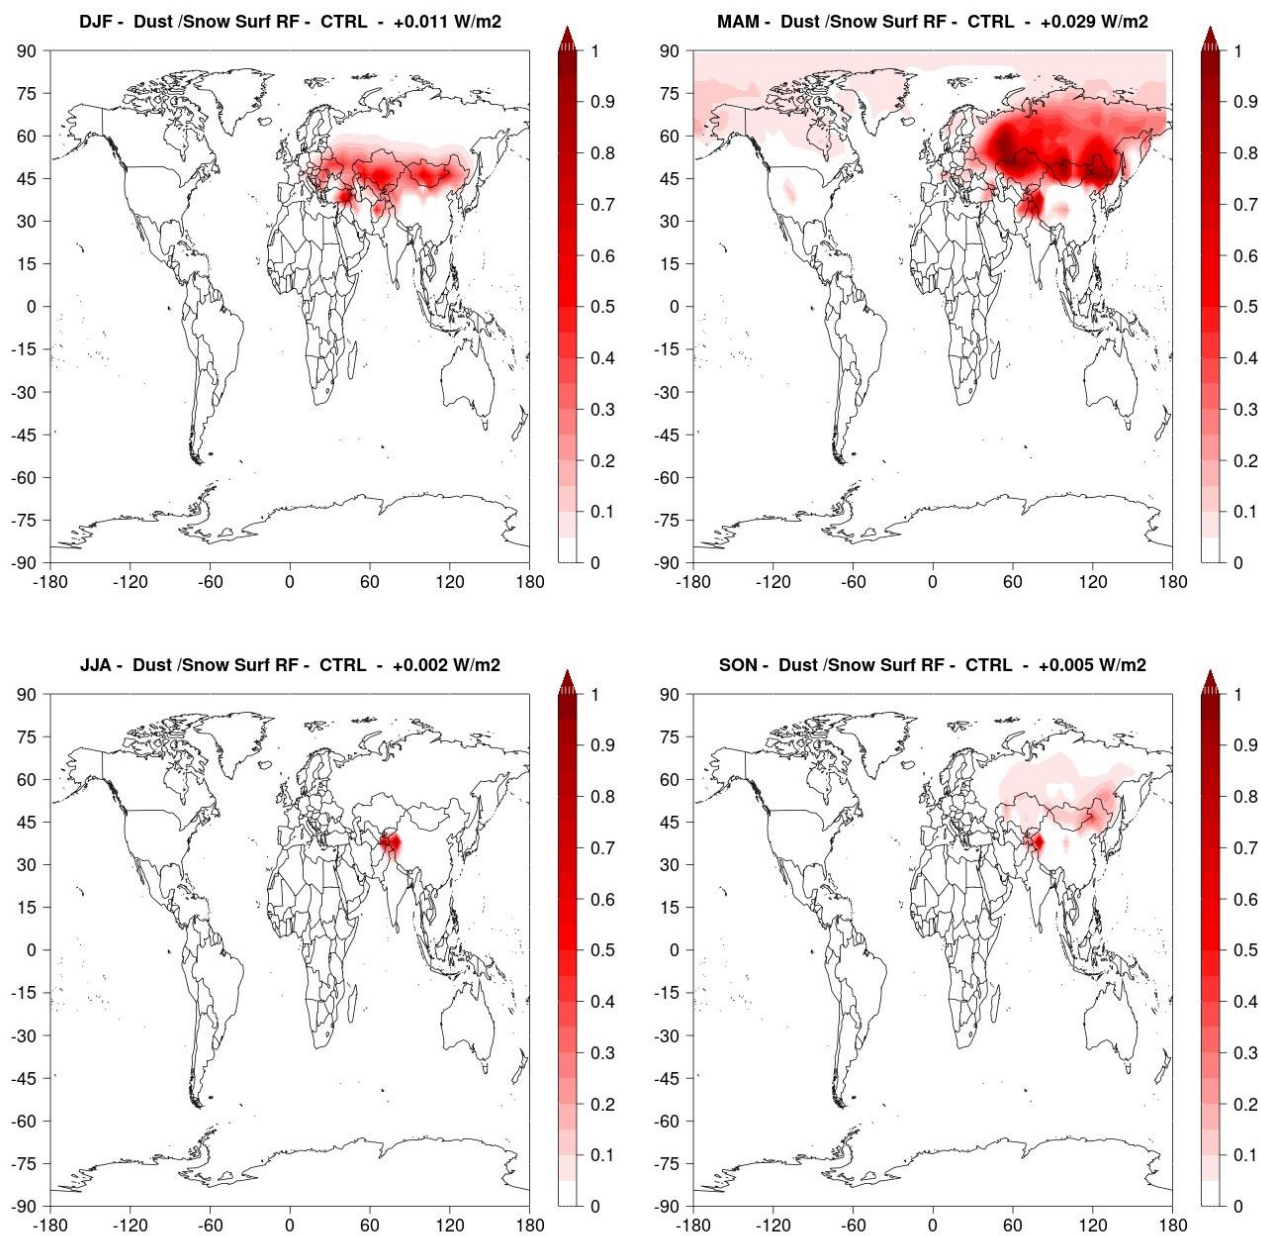

**Figure S4.** Same as Figure S3, but for soil dust.
